# Supplementary material for: Are the Steps on Likert Scales Equidistant? Responses on Visual Analog Scales Allow Estimating Their Distances
Source: PubMed Central journal article supplement — Educ Psychol Meas. 2023 Apr 4;84(1):91–122. doi: 10.1177/00131644231164316 (PMC10795572; doi:10.1177/00131644231164316), 2023-04-04
Supplement: sj-pdf-1-epm-10.1177_00131644231164316.pdf [file sj-pdf-1-epm-10.1177_00131644231164316.pdf]

**Are the steps on Likert scales equidistant?  
Responses on visual analog scales allow estimating their distances**

**Supplementary Material**

*Educational and Psychological Measurement*

<https://doi.org/10.1177/00131644231164316>

Miguel A. García-Pérez

Departamento de Metodología, Facultad de Psicología, Universidad Complutense,  
Campus de Somosaguas, 28223 Madrid, Spain

- Section 1.** Graphical simulation results for 300 subjects, 8 items, and discretization boundaries that vary across items
- Section 2.** Parameter estimates for the items on three personality scales
- Section 3.** Relation between VAS and Likert responses in each item on each personality scale
- Section 4.** NO-GRM category response functions estimated from Likert responses on each personality scale versus those predicted from VAS responses

**Section 1.**  
**Graphical simulation results for 300 subjects, 8 items, and discretization boundaries that vary across items**

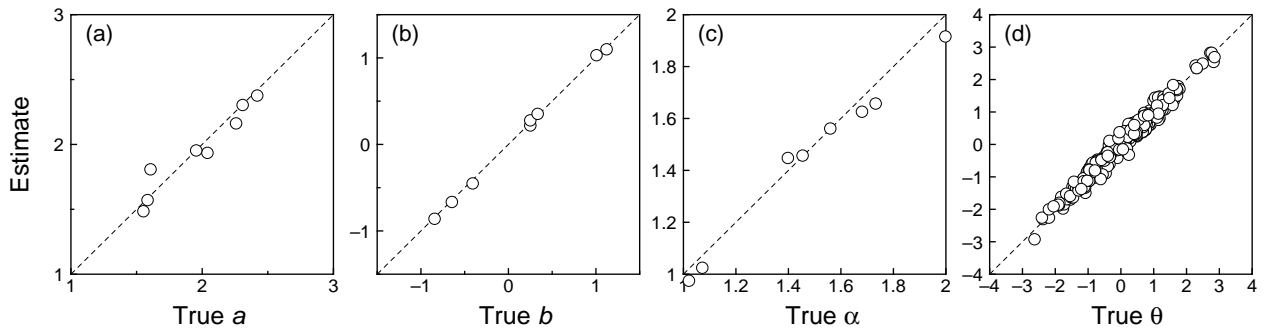

Analogous to Fig. 4 in the paper

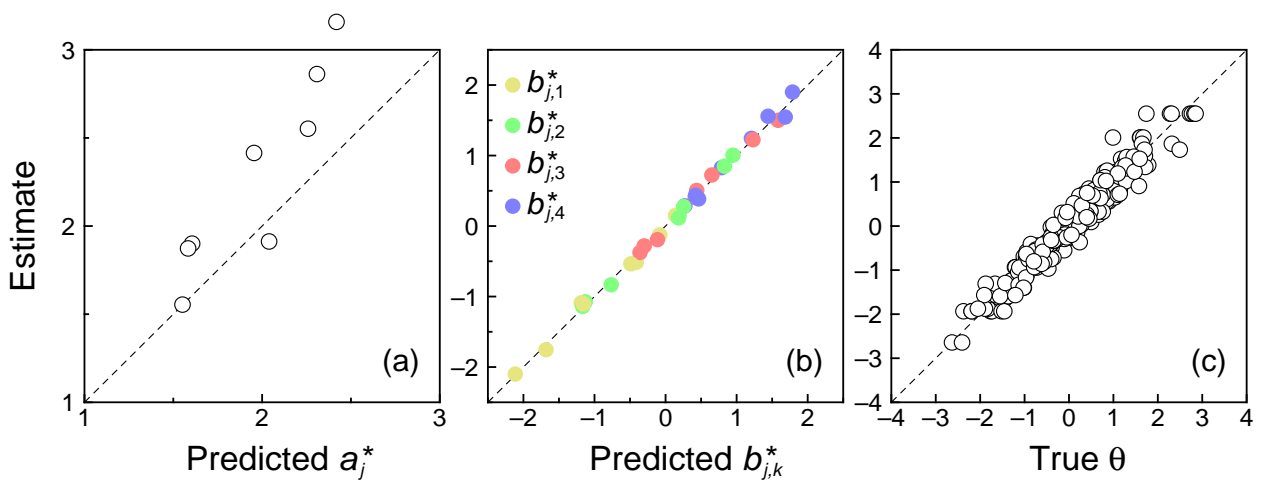

Analogous to Fig. 5 in the paper

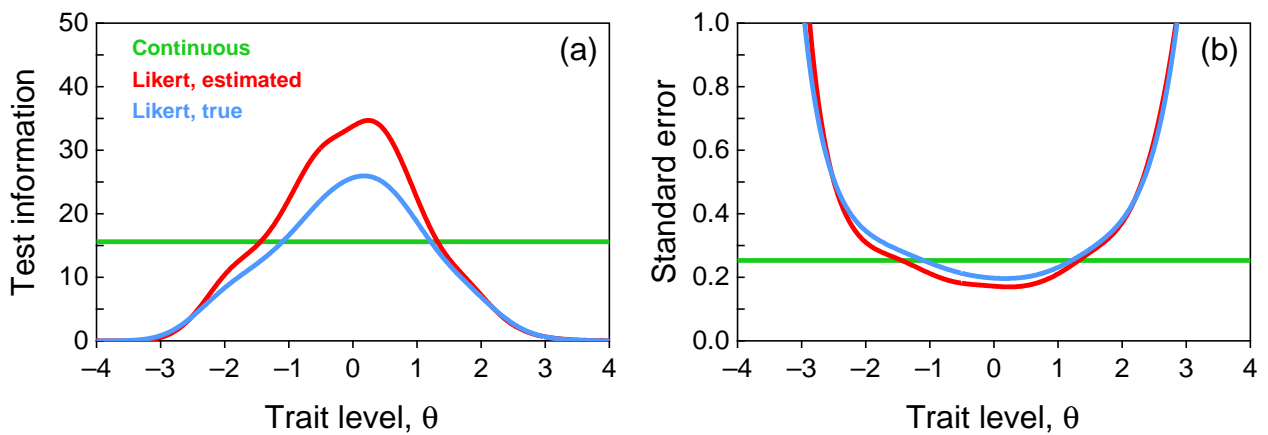

Analogous to Fig. 6 in the paper

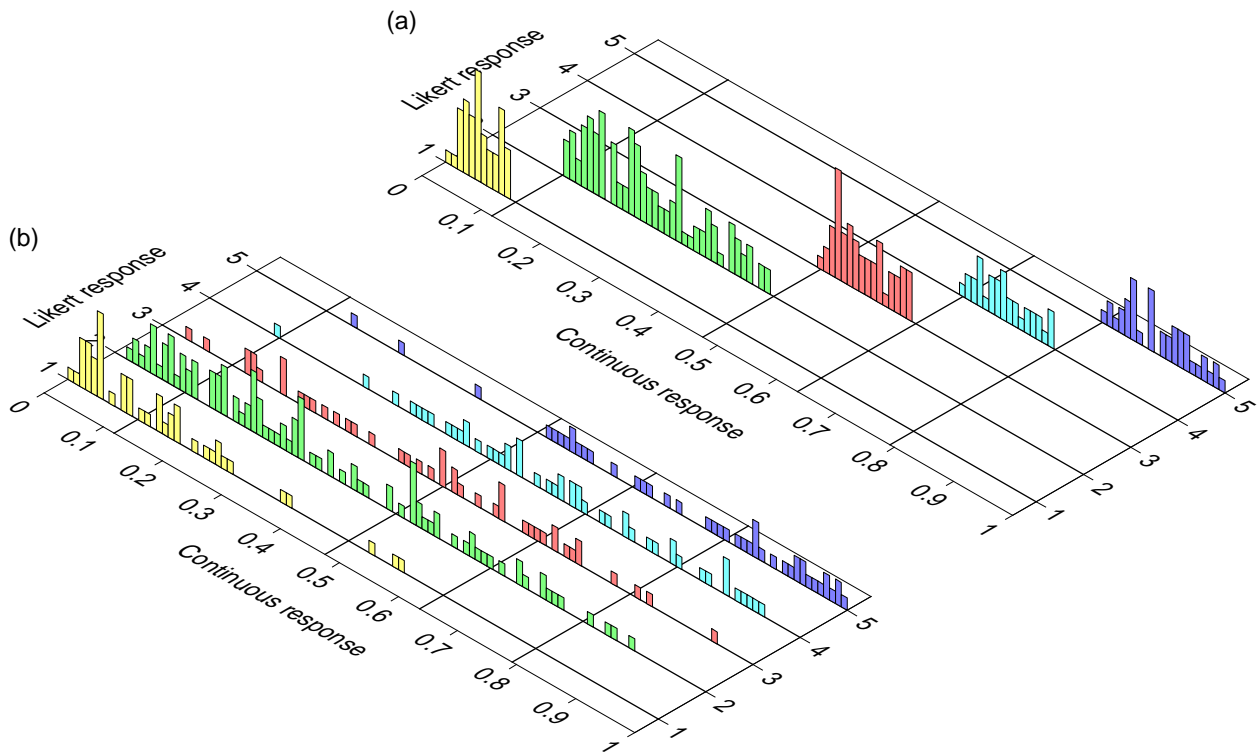

Analogous to Fig. 7 in the paper

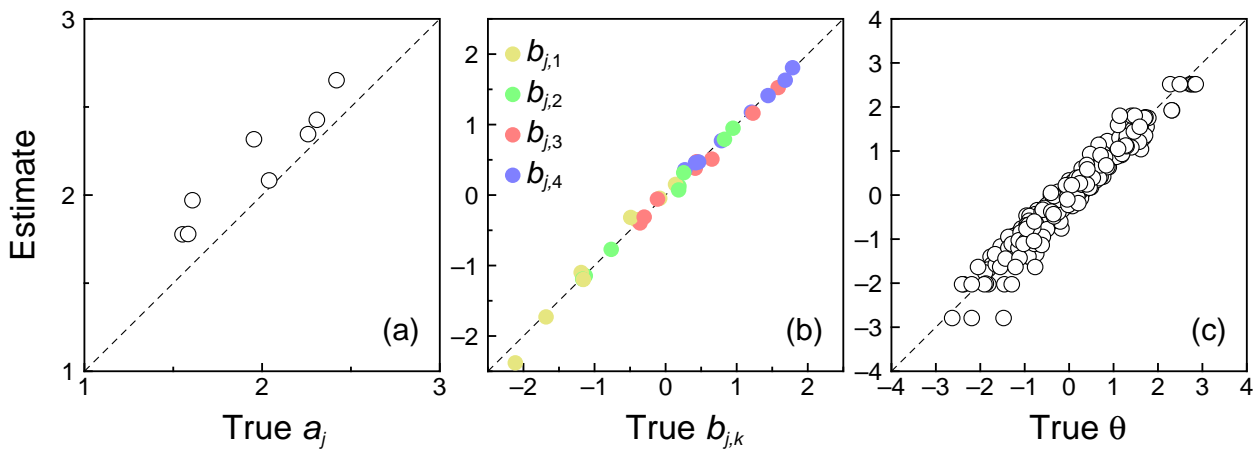

Analogous to Fig. 8 in the paper

**Section 2.**  
**Parameter estimates for the items on three personality scales**

|                 | CRM item parameters |         |            | NO-GRM item parameters |           |           |           |           |
|-----------------|---------------------|---------|------------|------------------------|-----------|-----------|-----------|-----------|
|                 | $a_j$               | $b_j$   | $\alpha_j$ | $a_j$                  | $b_{j,1}$ | $b_{j,2}$ | $b_{j,3}$ | $b_{j,4}$ |
| <b>C scale</b>  |                     |         |            |                        |           |           |           |           |
| Item 1          | 0.8183              | -1.3317 | 1.0292     | 1.0070                 | -4.6025   | -2.0072   | -0.9890   | 1.1164    |
| Item 2          | 0.7721              | -1.1619 | 0.9900     | 0.9656                 | -3.3285   | -1.6342   | -0.6399   | 1.2247    |
| Item 3          | 0.4676              | -1.5178 | 0.7558     | 0.6360                 | -3.9724   | -1.7540   | -0.7723   | 1.3233    |
| Item 4          | 0.8908              | -2.2000 | 1.0518     | 0.7968                 | -4.5304   | -3.6822   | -2.4811   | -0.1196   |
| Item 5          | 0.8209              | -1.0586 | 0.9196     | 0.9553                 | -3.7411   | -1.8030   | -0.3120   | 1.4652    |
| Item 6          | 0.5058              | -0.1275 | 0.8826     | 0.6878                 | -2.3394   | -0.8951   | 0.3125    | 1.8518    |
| Item 7          | 0.6902              | -1.3398 | 0.8444     | 0.6401                 | -4.5457   | -2.7628   | -0.7552   | 1.7499    |
| Item 8          | 0.7645              | -2.7636 | 0.9582     | 0.8081                 | -4.4596   | -3.7801   | -2.8063   | -0.4846   |
| Item 9          | 0.5622              | -1.4387 | 0.8926     | 0.5714                 | -3.8755   | -1.8019   | -1.0596   | 1.0770    |
| Item 10         | 1.0355              | -1.3117 | 1.0281     | 1.0070                 | -4.7081   | -2.4179   | -0.9841   | 1.2912    |
| Item 11         | 0.6187              | -2.5101 | 0.9278     | 0.8212                 | -4.1967   | -2.5804   | -1.7124   | -0.3231   |
| Item 12         | 0.6066              | -0.8124 | 0.9415     | 0.5029                 | -3.5762   | -1.8264   | -0.1537   | 2.3096    |
| <b>ES scale</b> |                     |         |            |                        |           |           |           |           |
| Item 1          | 0.3912              | -0.3368 | 0.6388     | 0.5571                 | -3.1122   | -0.9946   | 0.4421    | 2.5522    |
| Item 2          | 0.3905              | 0.0254  | 0.9482     | 0.5577                 | -1.4325   | -0.4993   | 0.2948    | 1.6687    |
| Item 3          | 0.9263              | 0.1475  | 1.5154     | 0.8189                 | -1.6090   | -0.2693   | 0.5270    | 1.9590    |
| Item 4          | 0.3517              | 0.2209  | 0.8578     | 0.4435                 | -1.4846   | -0.3647   | 0.6992    | 2.3044    |
| Item 5          | 0.3807              | 0.5846  | 0.6214     | 0.5359                 | -2.4343   | -0.4332   | 1.3431    | 3.4592    |
| Item 6          | 0.9738              | 0.0616  | 1.9871     | 0.8189                 | -1.0282   | -0.2964   | 0.2346    | 1.1639    |
| Item 7          | 0.3668              | 0.3274  | 0.6265     | 0.5150                 | -2.6024   | -0.4640   | 1.0742    | 2.9596    |
| Item 8          | 0.4937              | 0.3831  | 0.9833     | 0.6771                 | -1.5406   | -0.2977   | 0.7325    | 2.1124    |
| <b>N scale</b>  |                     |         |            |                        |           |           |           |           |
| Item 1          | 0.7239              | 1.4603  | 0.9699     | 0.9526                 | -0.7914   | 0.7564    | 1.8544    | 3.3383    |
| Item 2          | 1.2320              | 0.9783  | 1.4104     | 0.9526                 | -0.7328   | 0.6442    | 1.7770    | 3.1275    |
| Item 3          | 0.5404              | 2.1252  | 0.9274     | 0.8214                 | -0.0858   | 1.2456    | 2.0517    | 3.1225    |
| Item 4          | 1.1511              | 0.6979  | 1.3809     | 0.9526                 | -1.2688   | 0.1302    | 1.2689    | 2.8793    |
| Item 5          | 1.1974              | 0.6290  | 1.2213     | 0.9526                 | -1.5371   | -0.0714   | 1.3261    | 2.9126    |
| Item 6          | 0.3521              | 3.9751  | 0.6283     | 0.5663                 | 0.5428    | 1.9840    | 2.9724    | 4.9948    |

### Section 3. Relation between VAS and Likert responses in each item on each personality scale

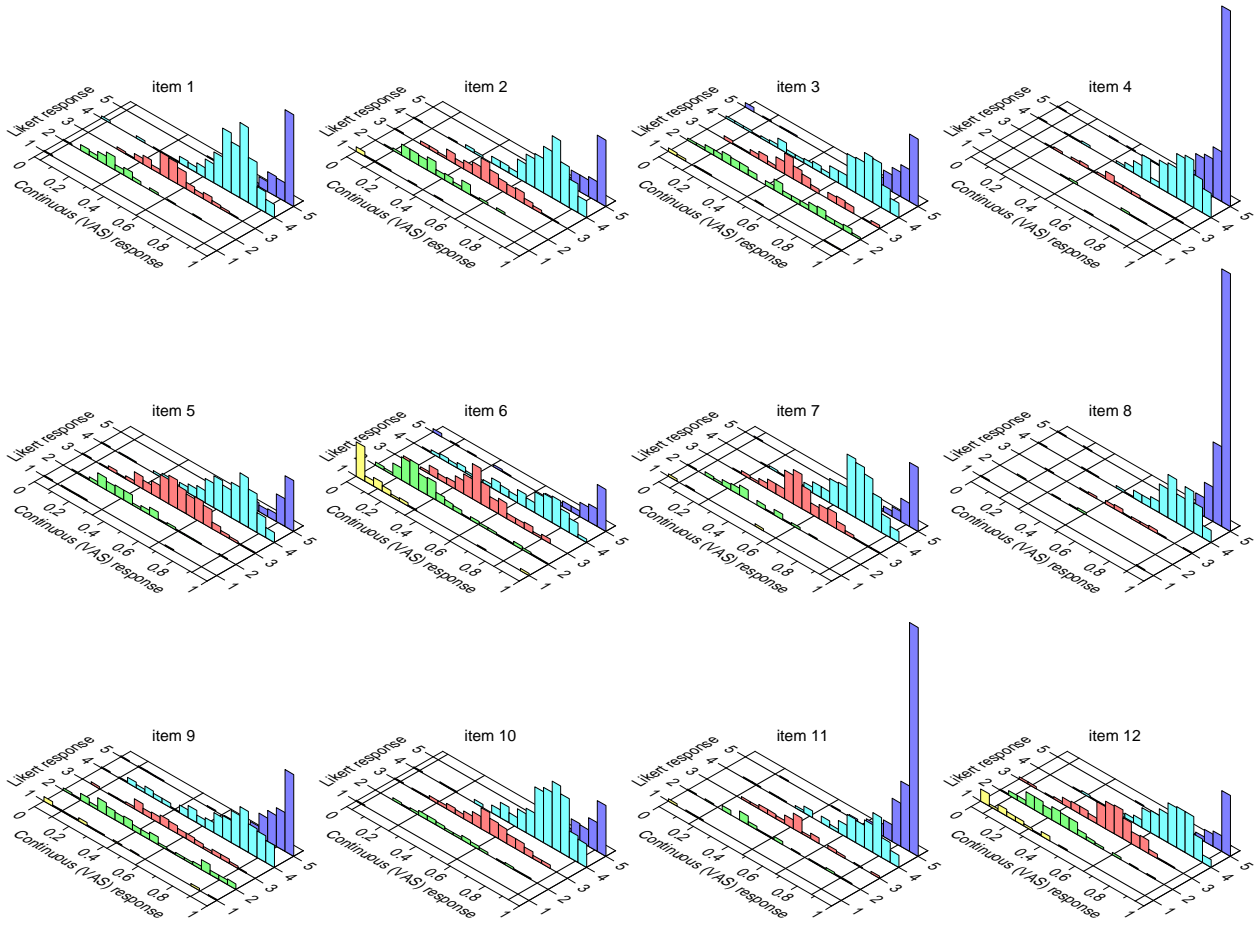

Analogous to Fig. 10 in the paper. Items on the C scale.

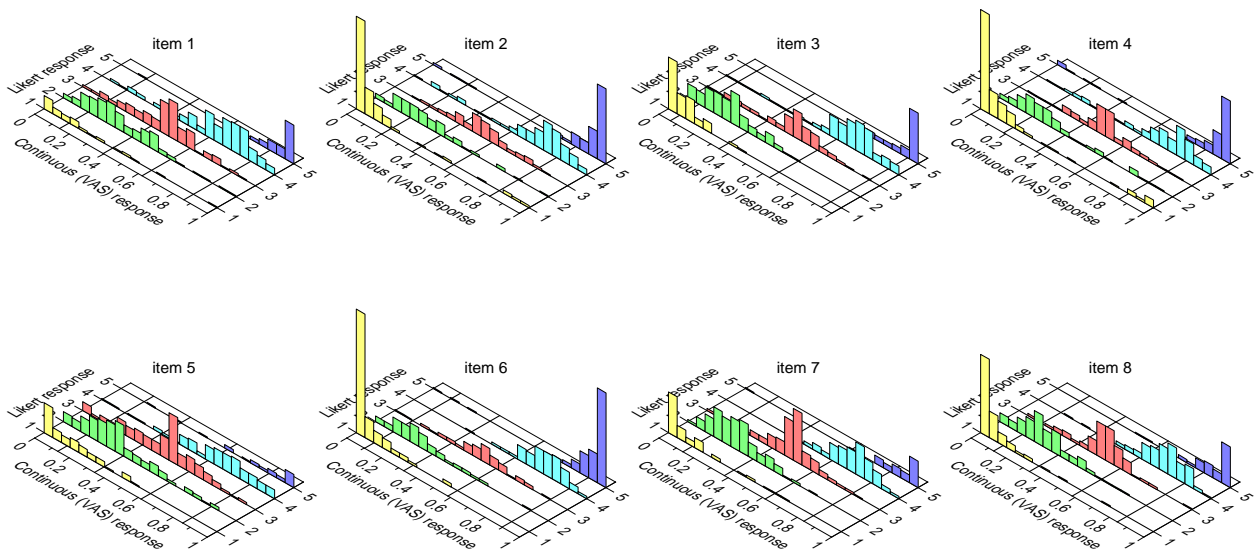

Identical to Fig. 10 in the paper. Items on the ES scale

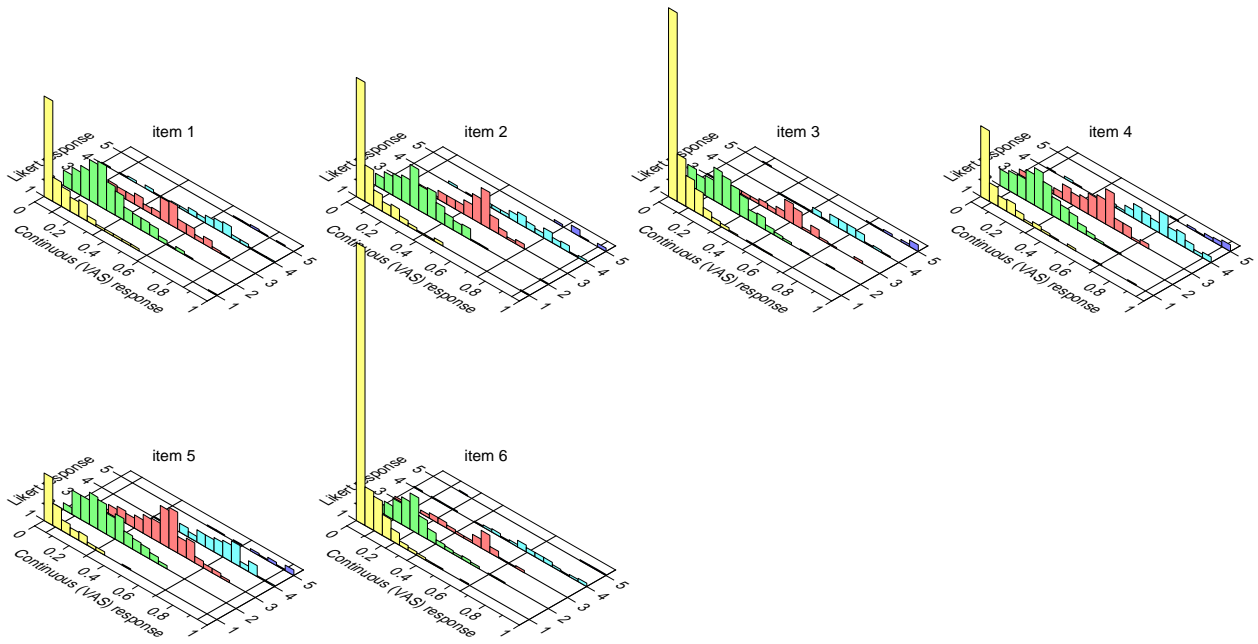

Analogous to Fig. 10 in the paper. Items on the N scale.

### Section 4.

## NO-GRM category response functions estimated from Likert responses on each personality scale versus those predicted from VAS responses

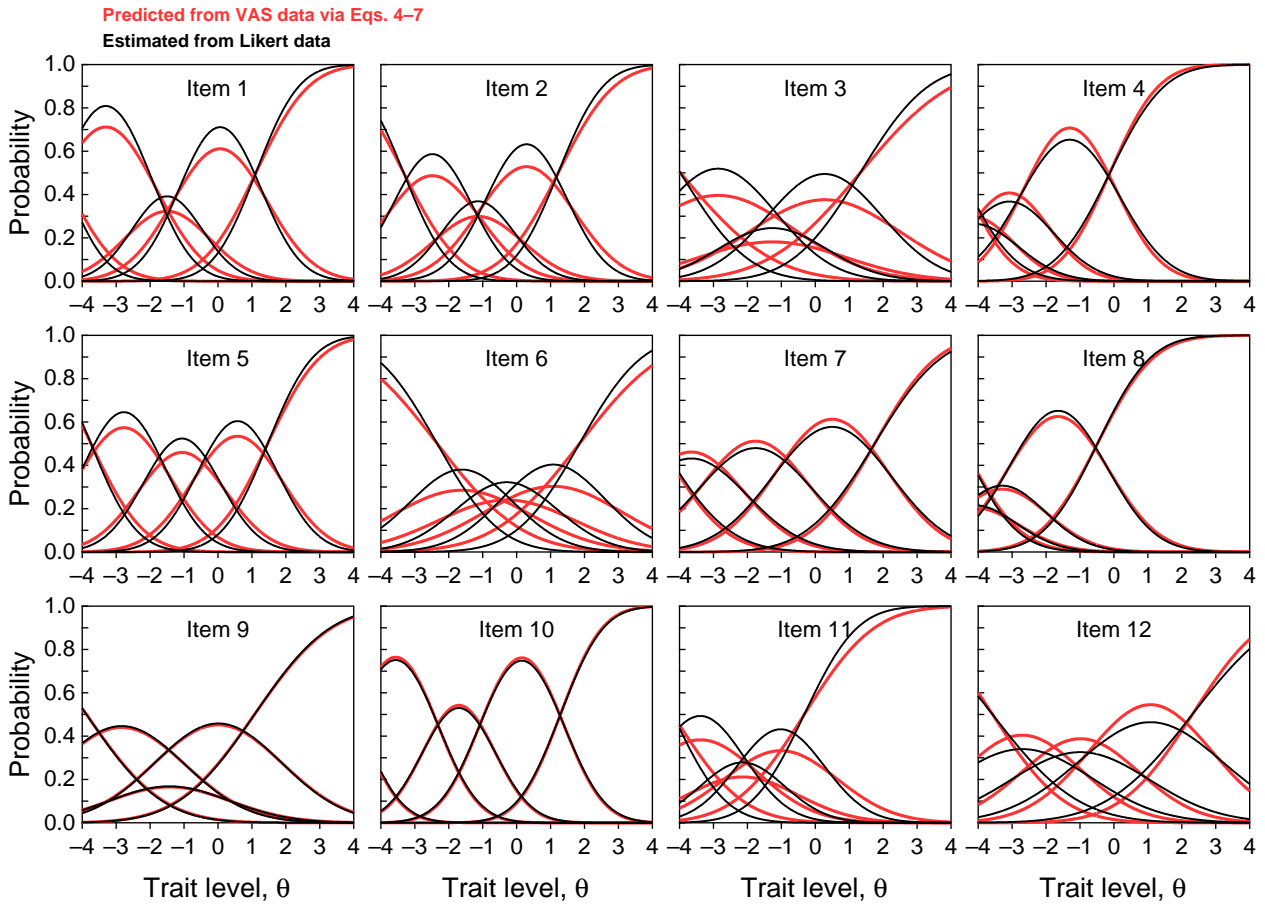

Analogous to Fig. 15 in the paper. Items on the C scale.

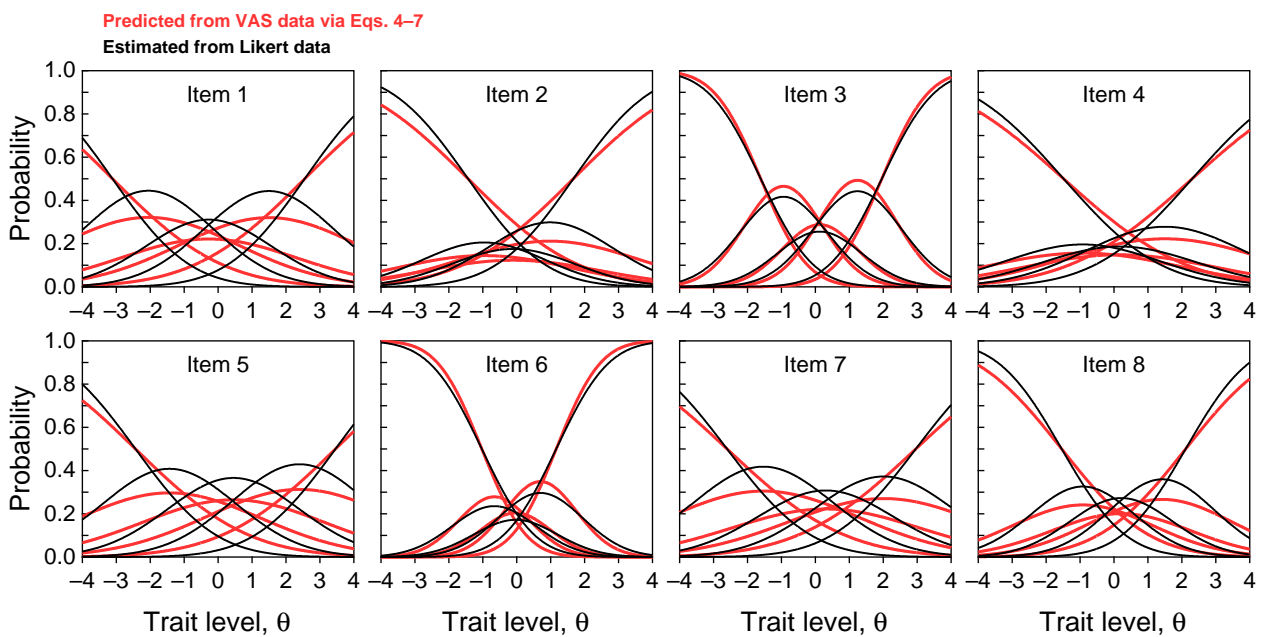

Identical to Fig. 15 in the paper. Items on the ES scale.

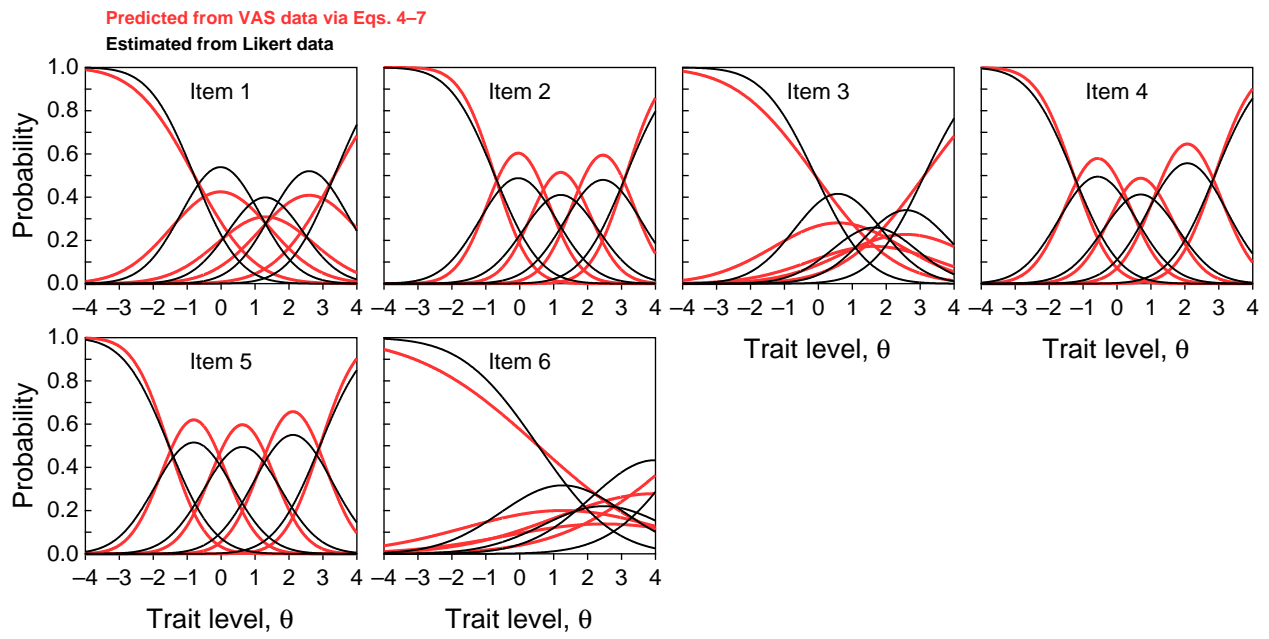

Analogous to Fig. 15 in the paper. Items on the N scale.
